# Supplementary material for: The rise in ocean plastics evidenced from a 60-year time series
Source: PubMed Central journal article supplement (PMC6467903; doi:10.1038/s41467-019-09506-1), 2019-04-16
Supplement: 41467_2019_9506_MOESM1_ESM.pdf [file 41467_2019_9506_MOESM1_ESM.pdf]

# **Supplementary Information: The rise in ocean plastics evidenced from a 60-year time series**

**Clare Ostle et al.**

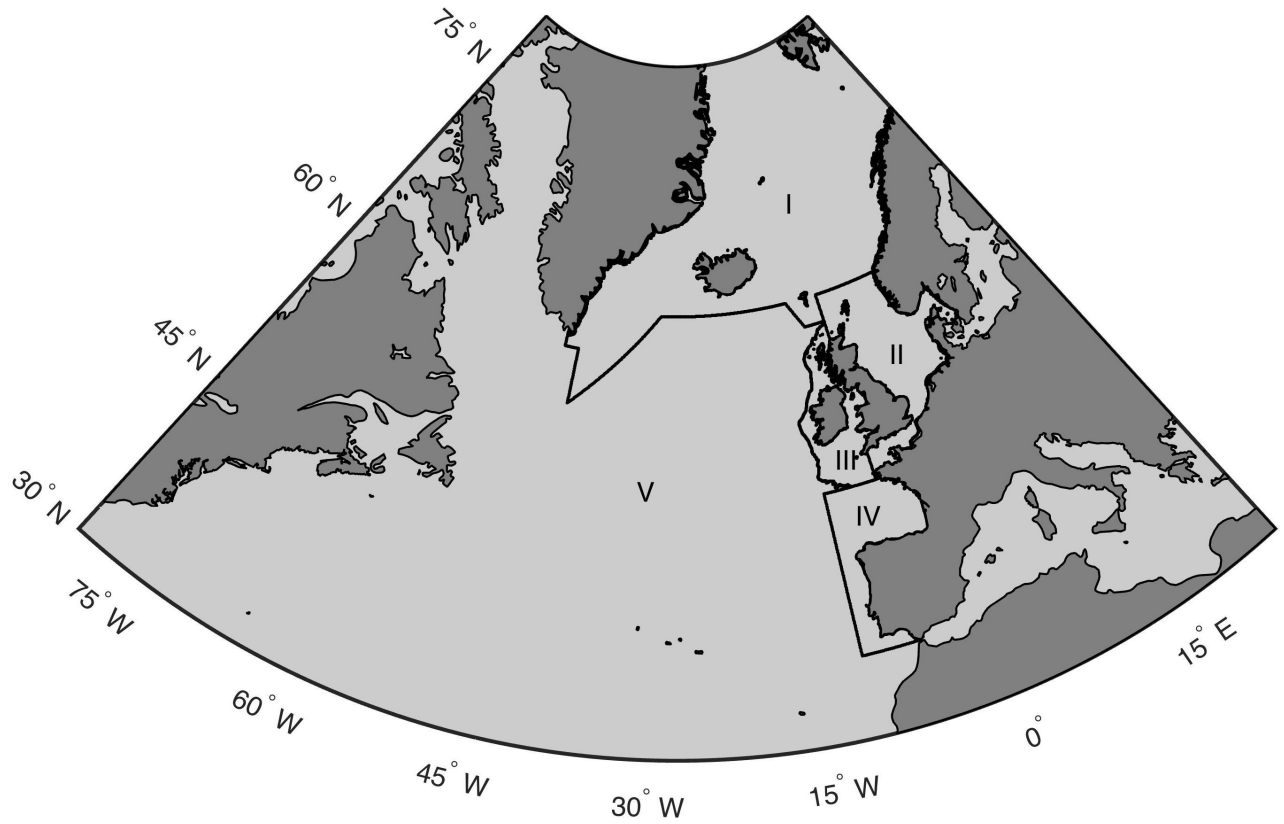

**Supplementary Figure 1. Map of regions used.** Map of the regions used to divide up the study area, based on OSPAR (Convention for the Protection of the Marine Environment of the North-East Atlantic) regions. I) Arctic Waters, II) Greater North Sea, III) Celtic Seas, IV) Bay of Biscay and Iberian Coast, V) Wider Atlantic. Note: The Wider Atlantic region has been adapted from the OSPAR region to extend to the west of the Atlantic to include the whole study area.

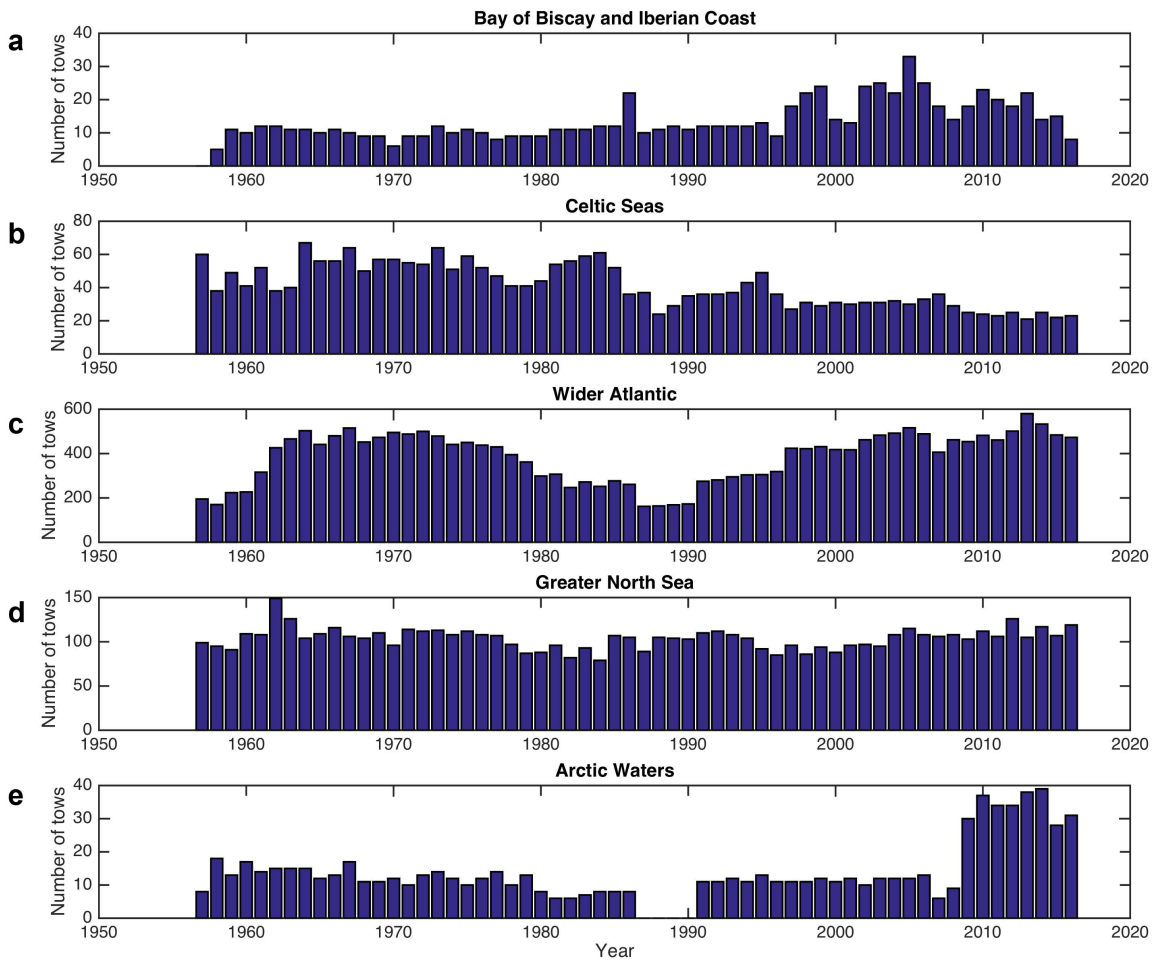

**Supplementary Figure 2. Number of tows in each region.** Bar chart of the number of Continuous Plankton Recorder tows per year for each region: **a**, Bay of Biscay and Iberian Coast **b**, Celtic Seas **c**, Wider Atlantic **d**, Greater North Sea and **e**, Arctic Waters.

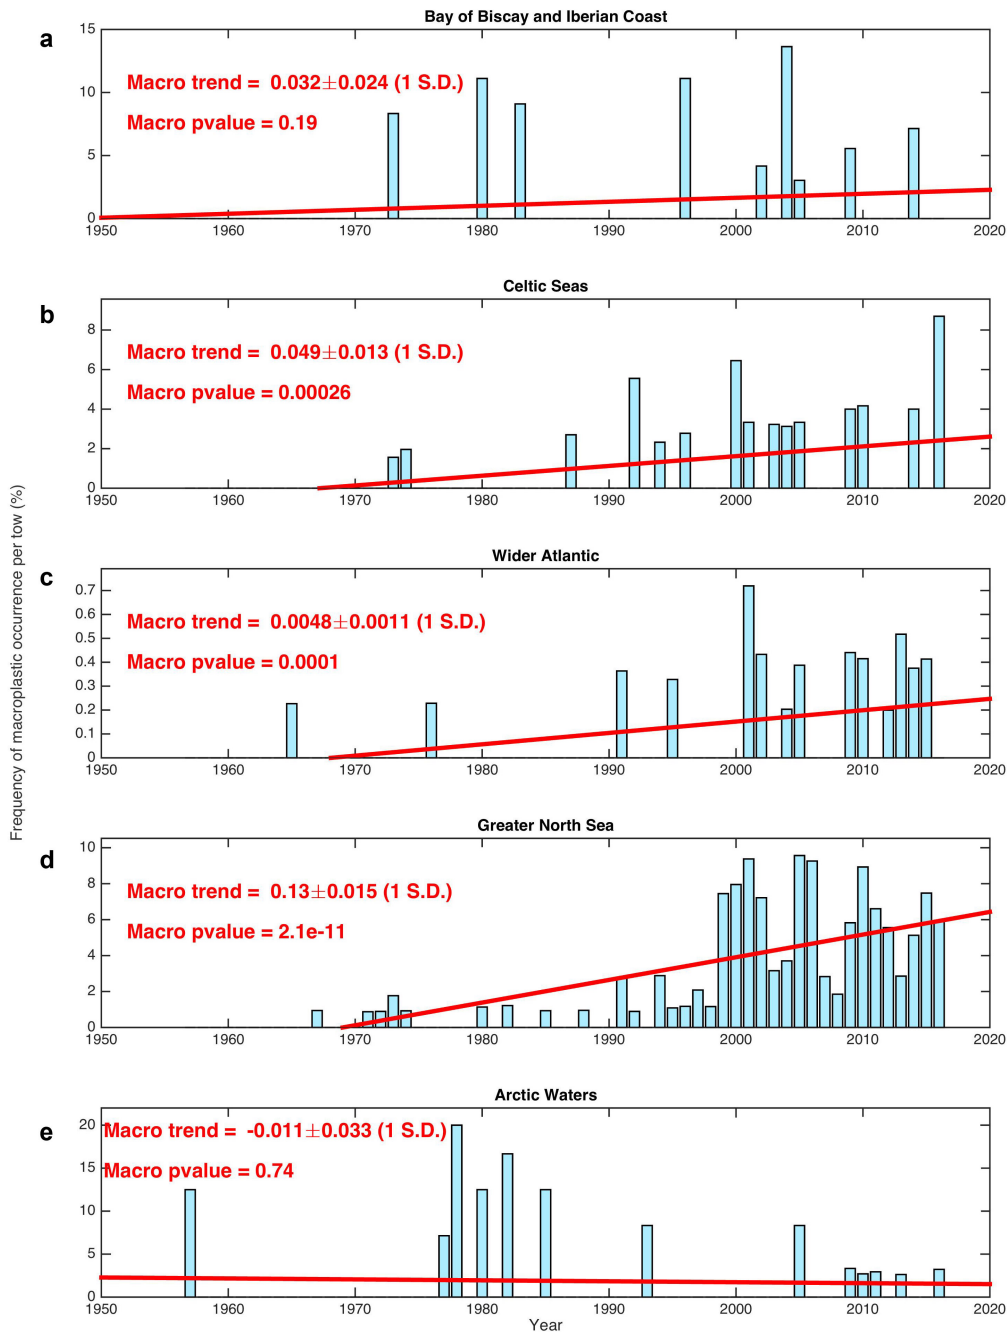

**Supplementary Figure 3. Regional macroplastic counts.** Annual counts of macroplastic, normalised for number of Continuous Plankton Recorder tows per year = light blue bars, linear trend (standard model I linear regression) shown in red (along with trend and student's t-test pvalue that trend is significantly different from zero) for each region: **a**, Bay of Biscay and Iberian Coast **b**, Celtic Seas **c**, Wider Atlantic **d**, Greater North Sea **e**, and Arctic Waters.

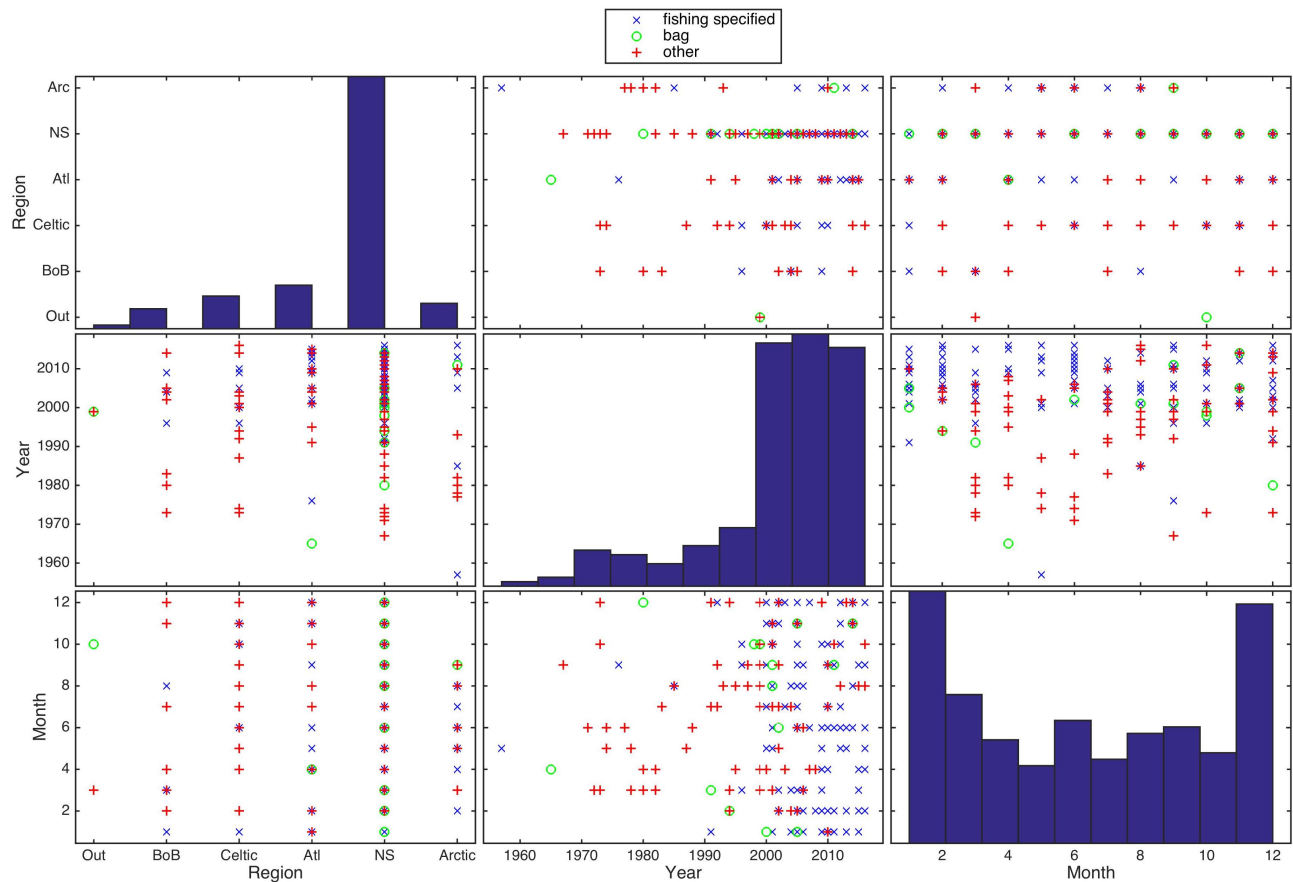

**Supplementary Figure 4. Grouped scatter of perMANOVA inputs.** Counts of macroplastic divided in to the following marine litter categories: fishing specified (blue ex), bag (green circle), and other (fishing not specified, red cross). Plotted against, year, month and region (Arc=Arctic Waters, NS=Greater North Sea, Atl=Wider Atlantic, Celtic=Celtic Seas, BoB=Bay of Biscay and Iberian Coast, Out=outside of defined regions (Fig. S3)). The diagonal subplots are histograms of the number of macroplastic entanglements per region, year and month respectively.

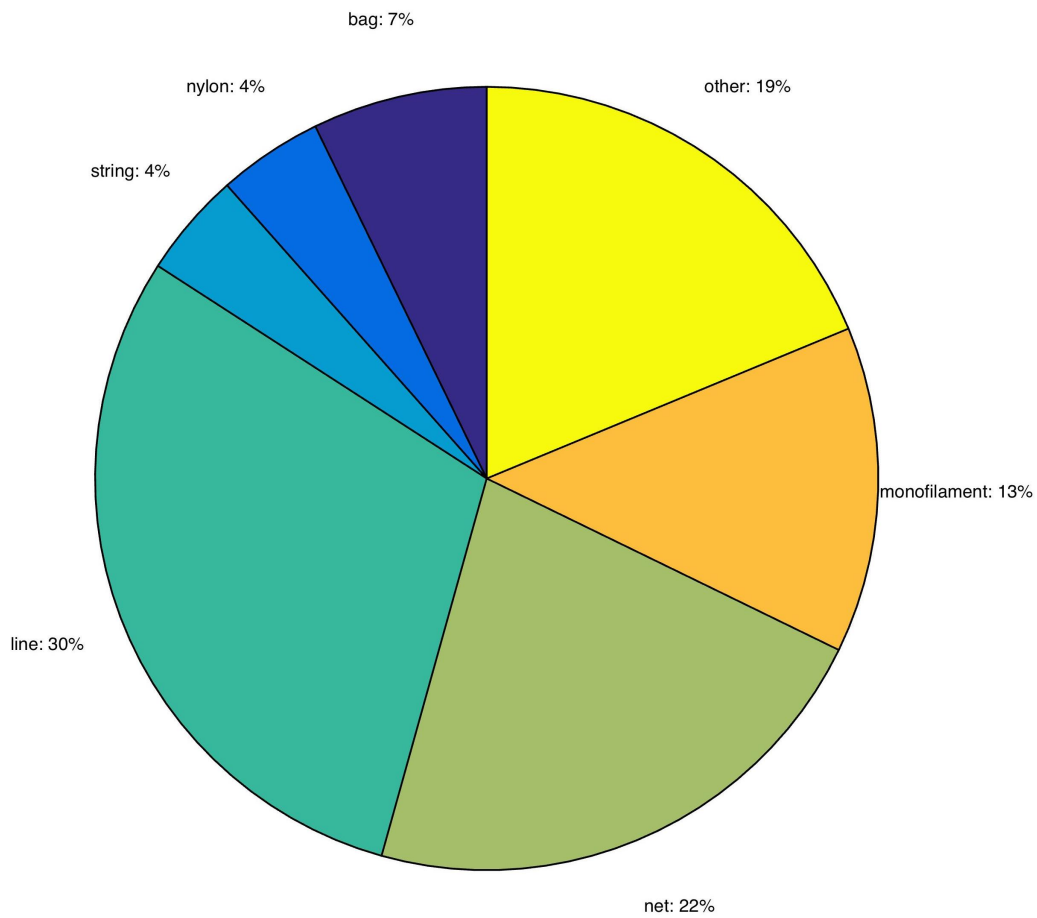

**Supplementary Figure 5. Contribution of macroplastic categories.** Pie chart of the percentage contribution of different categories to macroplastic counts from the Continuous Plankton Recorder from 1957 to 2016. Note: Those macroplastic records that do not specify a describing word shown in the pie chart are included in the other category.

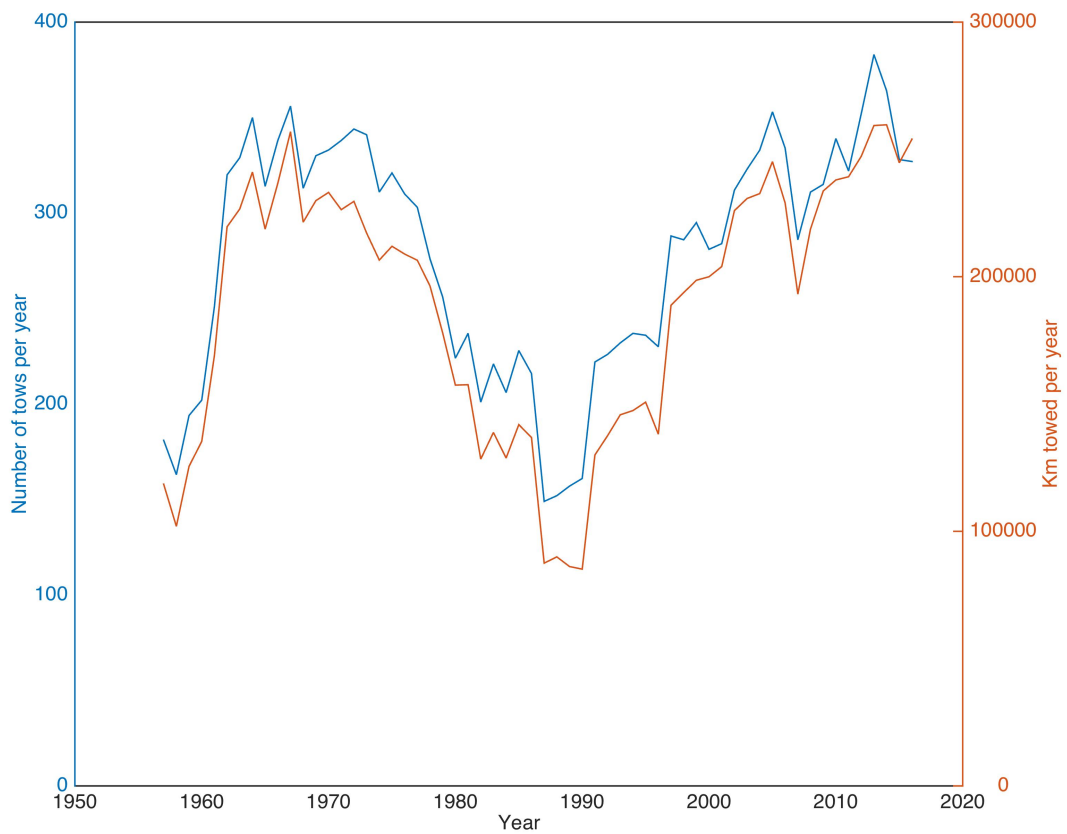

**Supplementary Figure 6. Number of km towed and number of tows.** Blue = Number of Continuous Plankton Recorder tows per year from 1957 to 2016. Red = Kilometres towed by the Continuous Plankton Recorder per year from 1957 to 2016.

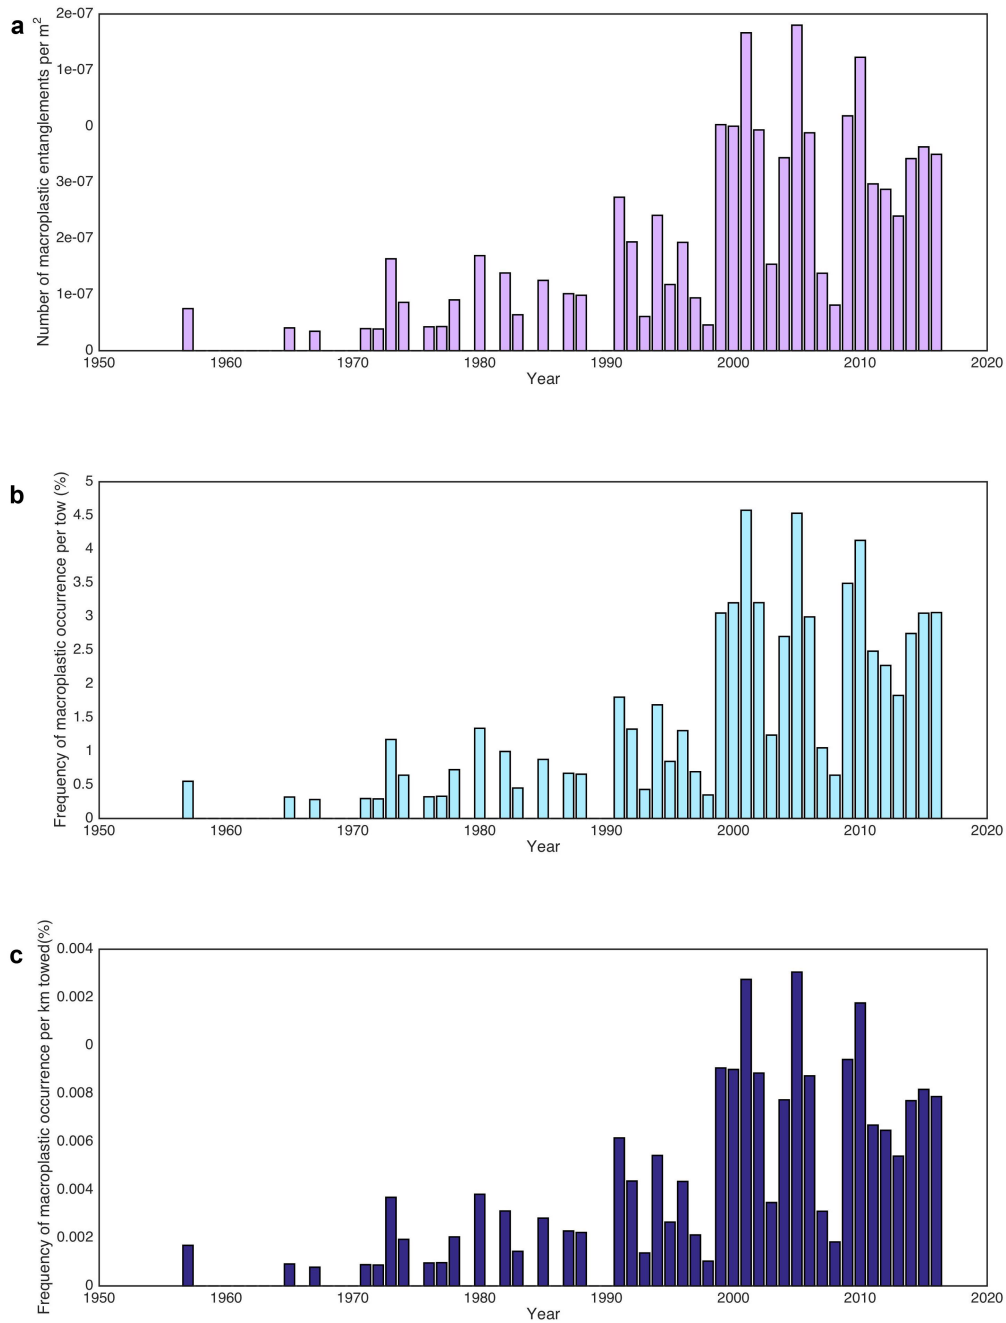

**Supplementary Figure 7. Macroplastic entanglements per area covered, tow and per km.** **a**, purple bars = number of macroplastic entanglements per area covered (area (m<sup>2</sup>) = distance towed (m) x width of CPR (0.225 m)). **b**, light blue bars = frequency of macroplastic occurrence per tow (%). **c**, dark blue bars = frequency of macroplastic occurrence per km towed (%). Note: The normalisation to area and distance towed shown in **a** and **c**, may not take into account sampling bias of the number of tows completed.
